# Supplementary material for: Evaluation of Poly(vinyl alcohol)–Xanthan Gum Hydrogels Loaded with Neomycin Sulfate as Systems for Drug Delivery
Source: MDPI journal article supplement (doi:10.3390/gels9080655), 2023-08-14
Supplement: s1 [file s1]

## Evaluation of PVA-Xanthan Gum Hydrogels Loaded with Neomycin Sulfate as Systems for drug delivery

Diana Serbezeanu<sup>1</sup>, Manuela Maria Iftime<sup>1</sup>, Gabriela-Liliana Ailiesei<sup>1</sup>, Alina-Mirela Ipate<sup>1</sup>, Alexandra Nistor<sup>1</sup>, Tăchiță Vlad-Bubulac<sup>1</sup>, Cristina Mihaela Rîmbu<sup>2</sup>

<sup>1</sup> Department of Polycondensation and Thermally Stable Polymers, “Petru Poni” Institute of Macromolecular Chemistry, 41A Grigore Ghica Voda Alley, 700487 Iasi, Romania

<sup>2</sup> Department of Public Health, Iasi University of Life Sciences, 8 Mihail Sadoveanu Alley, 707027 Iasi, Romania

\* Correspondence: [diana.serbezeanu@icmpp.ro](mailto:diana.serbezeanu@icmpp.ro)

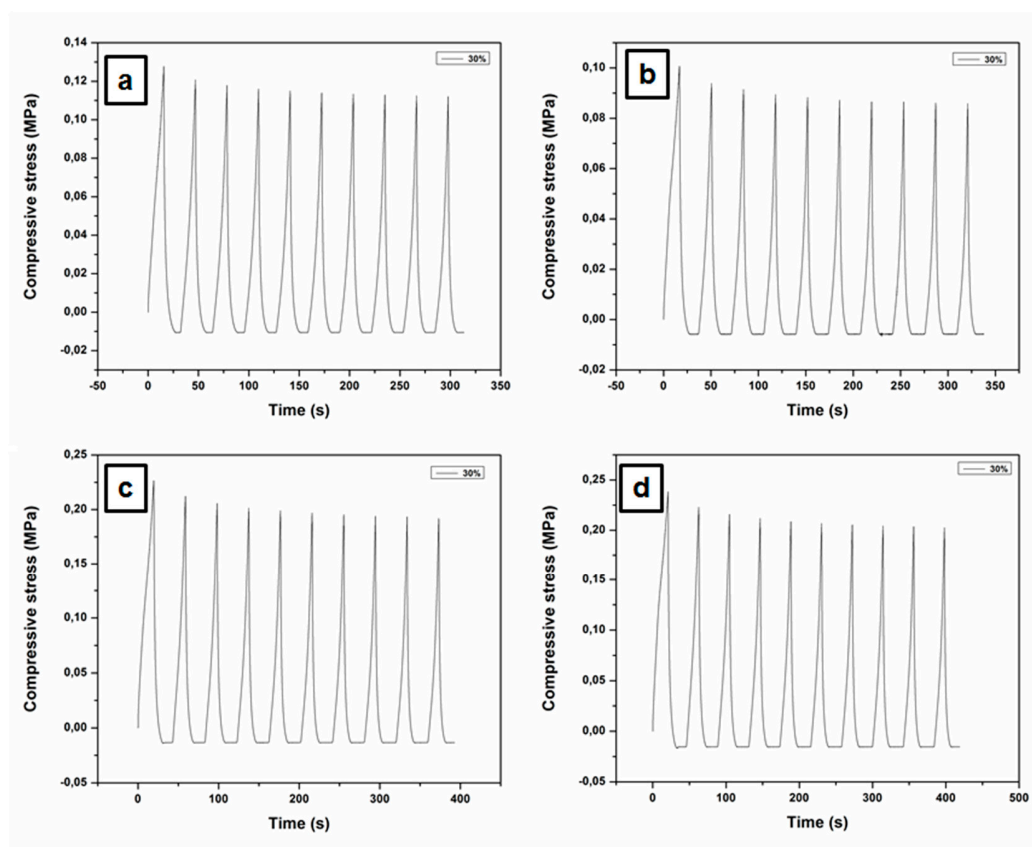

**Figure S1.** Compression tests on the studied PVA/XG-80/20 hydrogels in the series under 30% compression at room temperature; PVA/XG-80/20 (a), PVA/XG-80/20-1 (b), PVA/XG-80/20-2 (c), PVA/XG-80/20-3 (d).

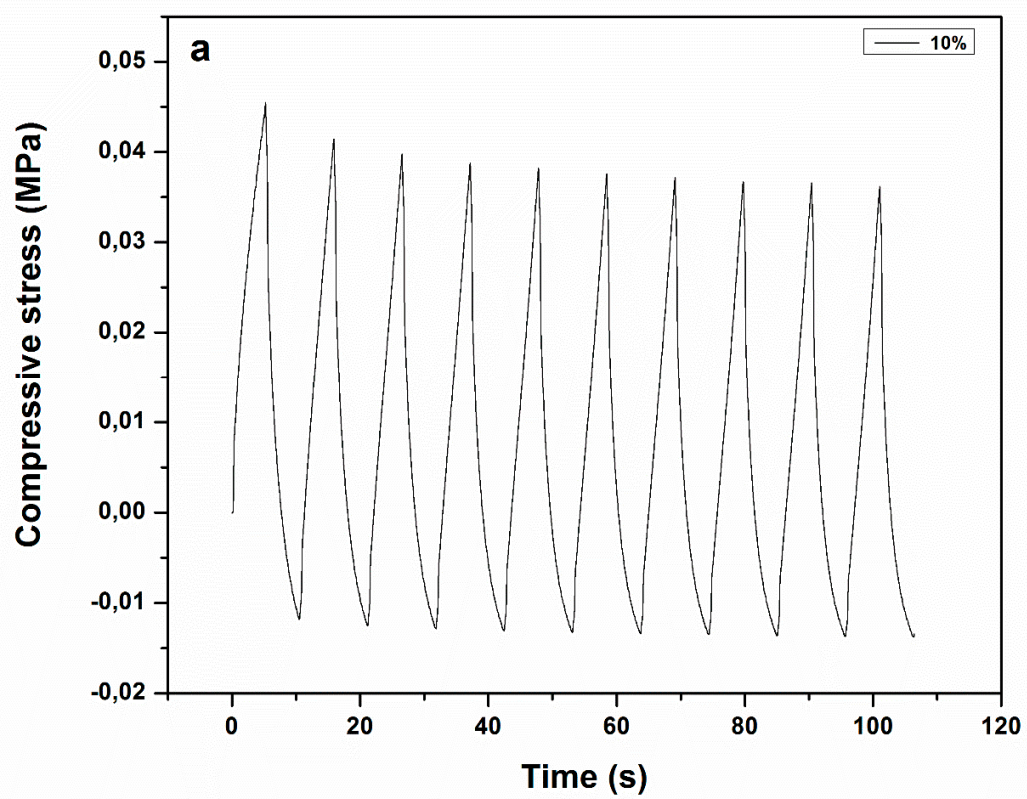

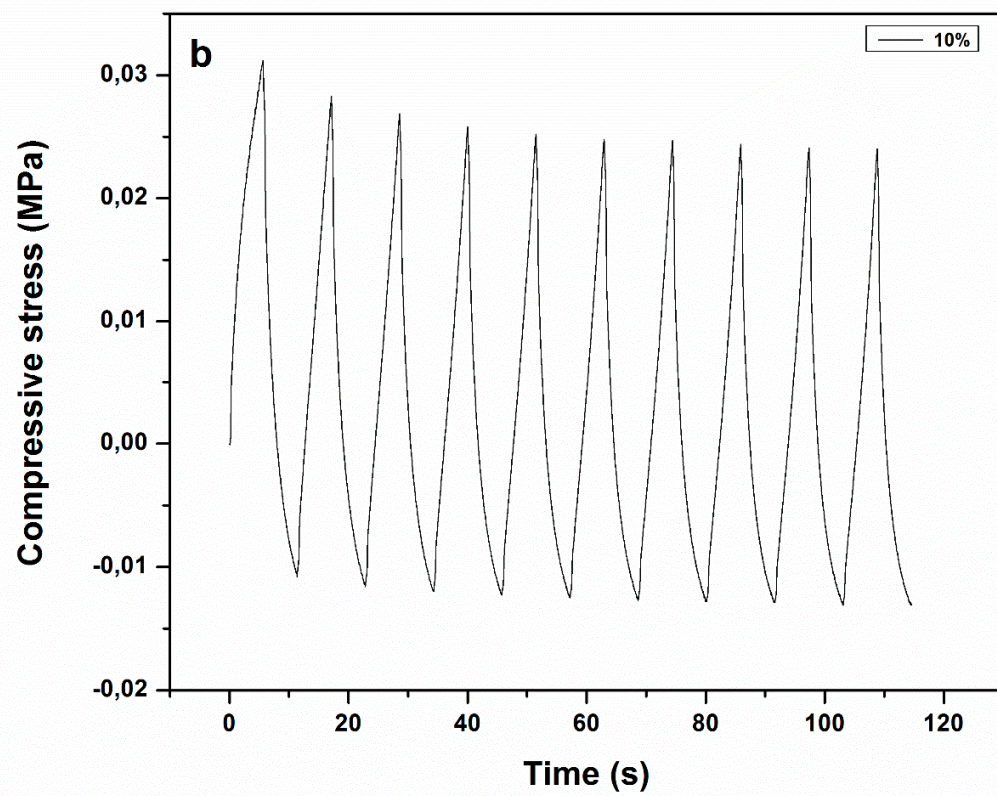

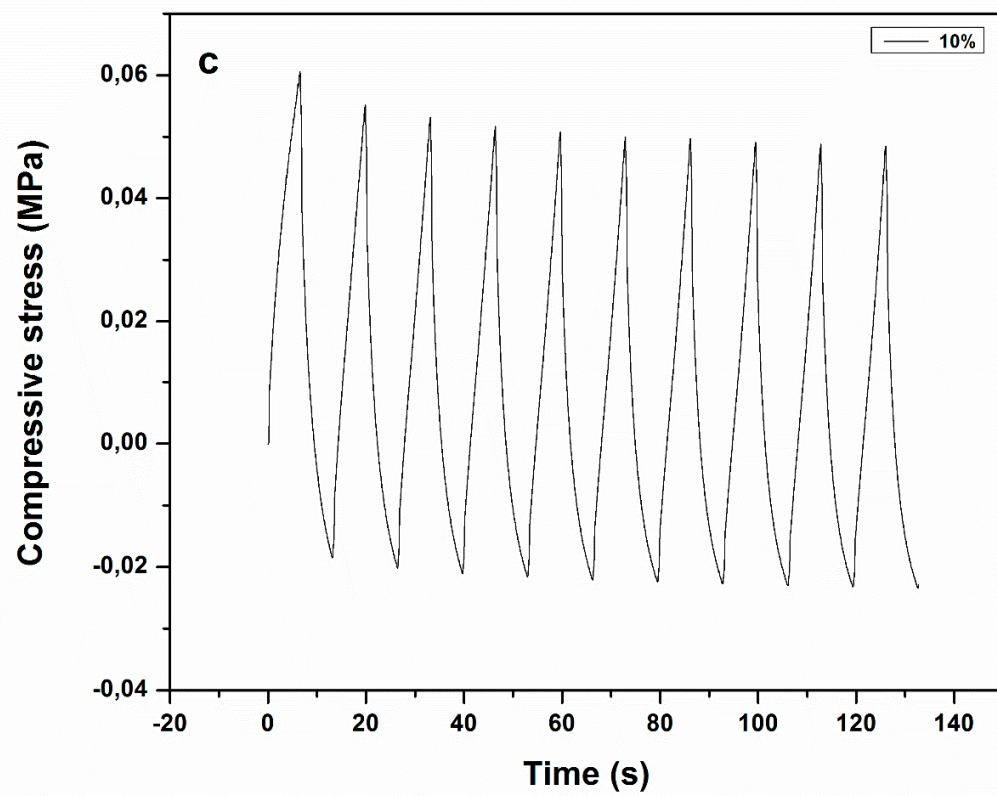

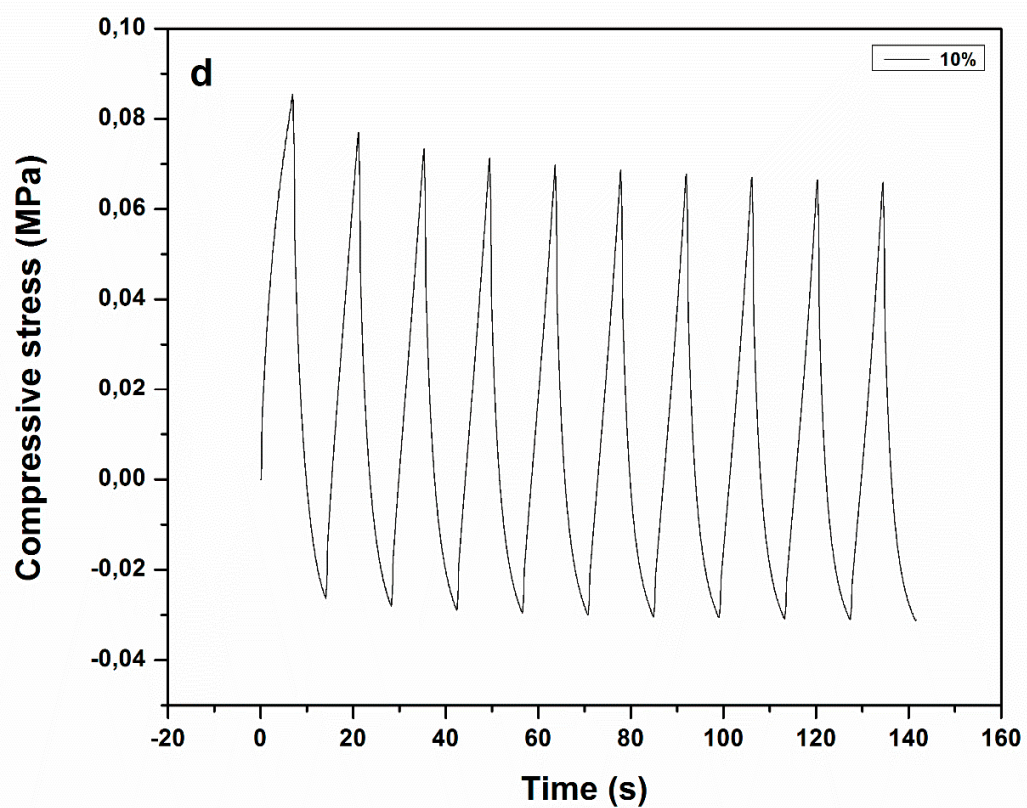

**Figure S2.** Compression tests on the studied PVA/XG-80/20 hydrogels in the series under 10% compression at room temperature PVA/XG-80/20 (a), PVA/XG-80/20-1 (b), PVA/XG-80/20-2 (c), PVA/XG-80/20-3 (d).

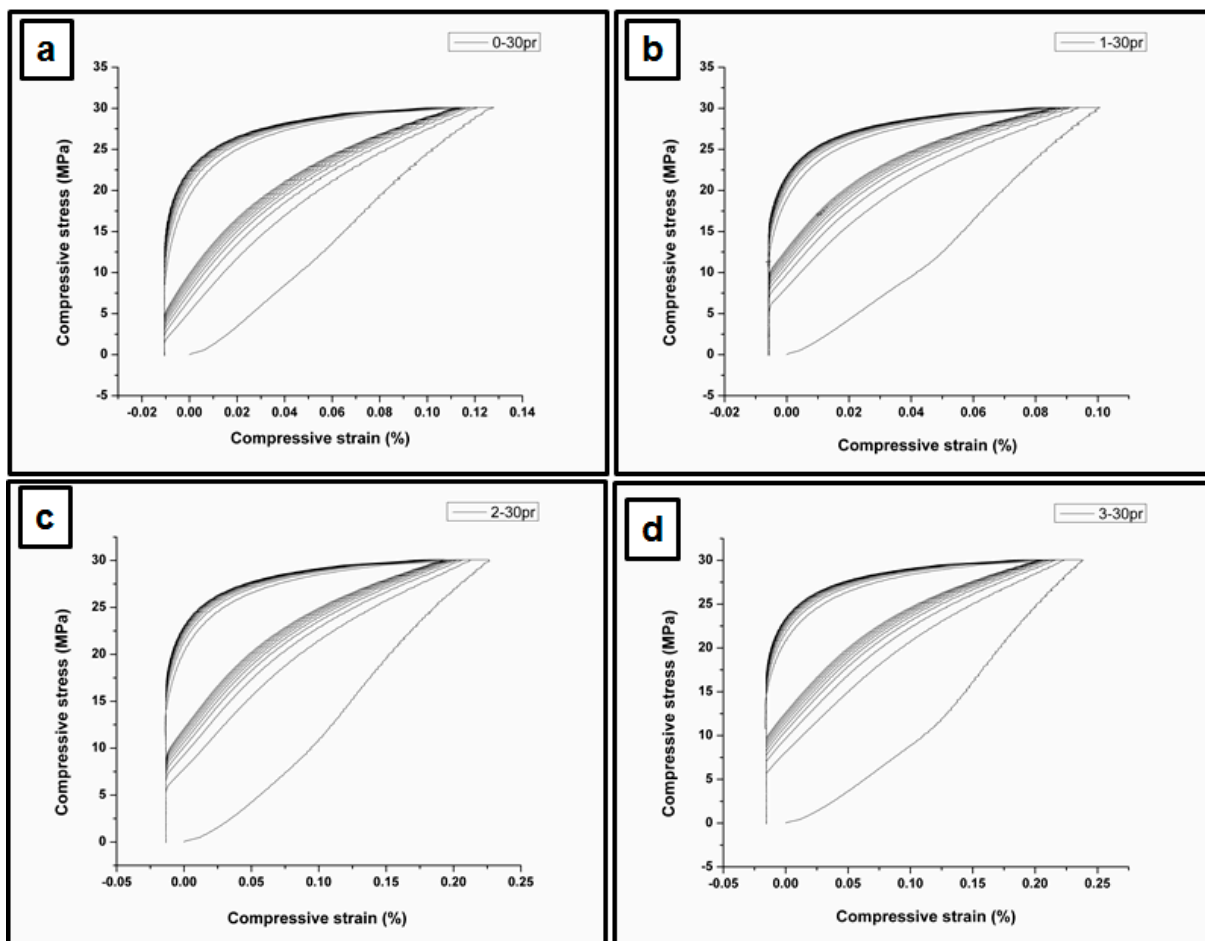

**Figure S3.** Compressive stress–strain curves of the studied PVA/XG-80/20 hydrogels in the series under 30% compression at room temperature; PVA/XG-80/20 (a), PVA/XG-80/20-1 (b), PVA/XG-80/20-2 (c), PVA/XG-80/20-3 (d).

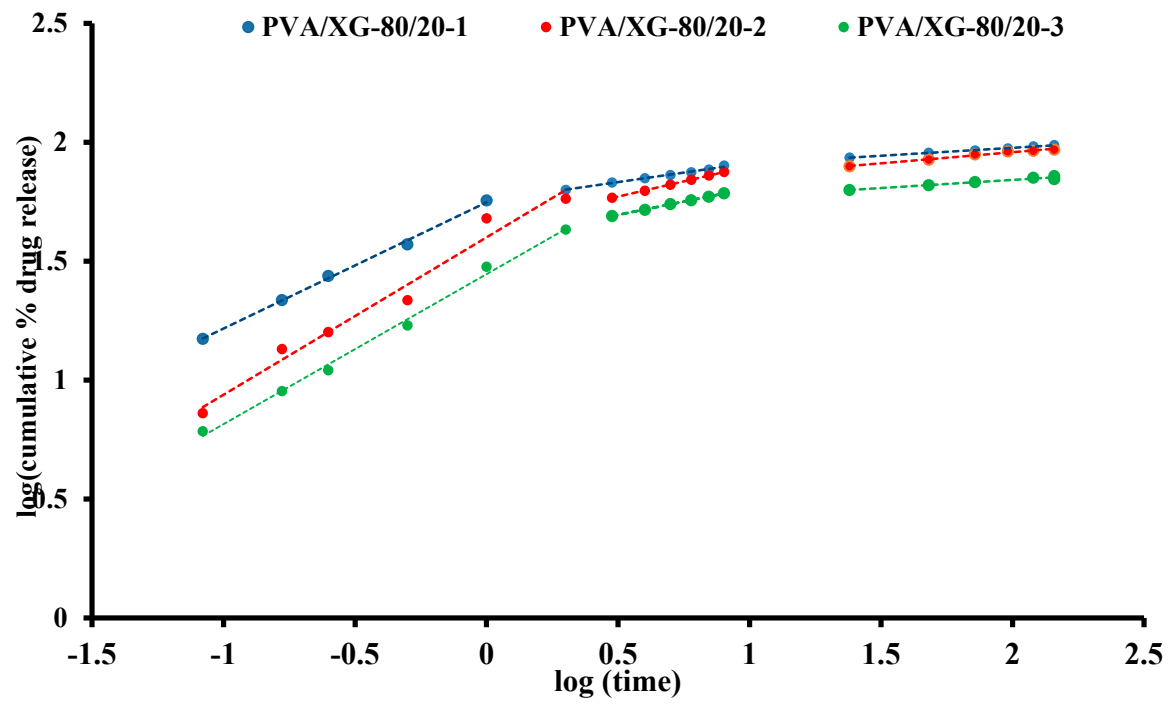

a) Korsmayer-Peppas



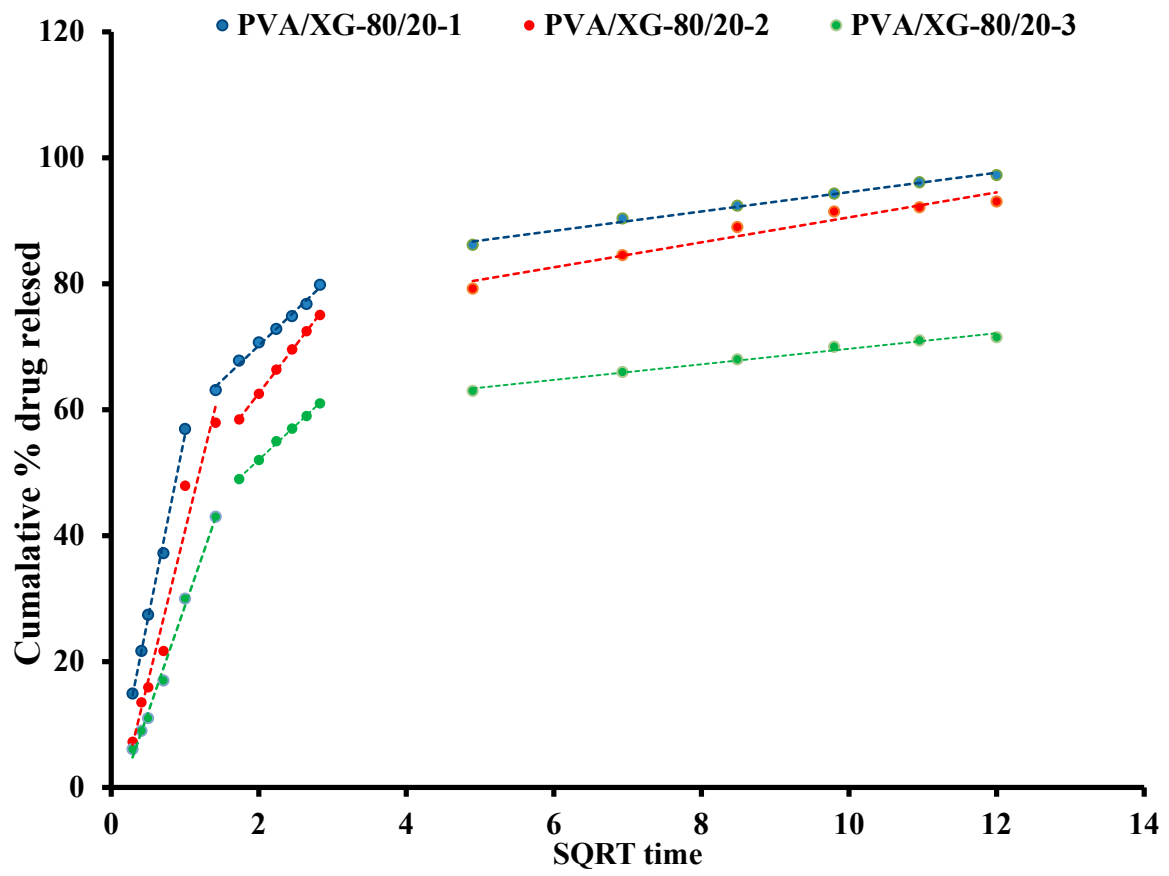

b) Higuchi



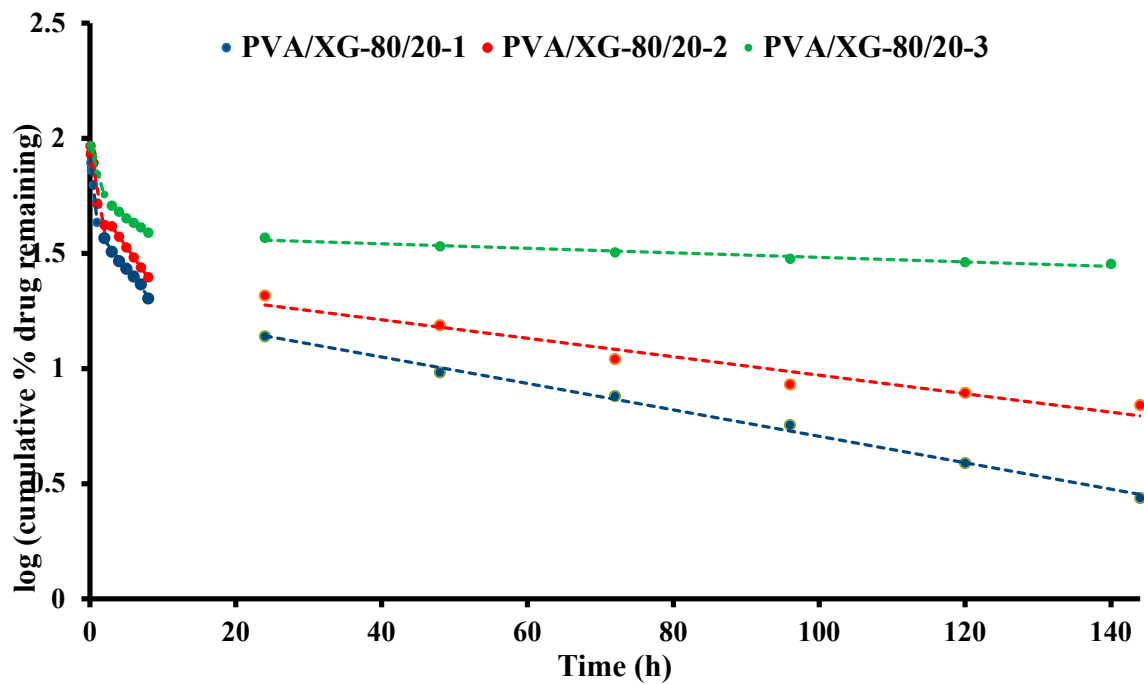

c) First Order

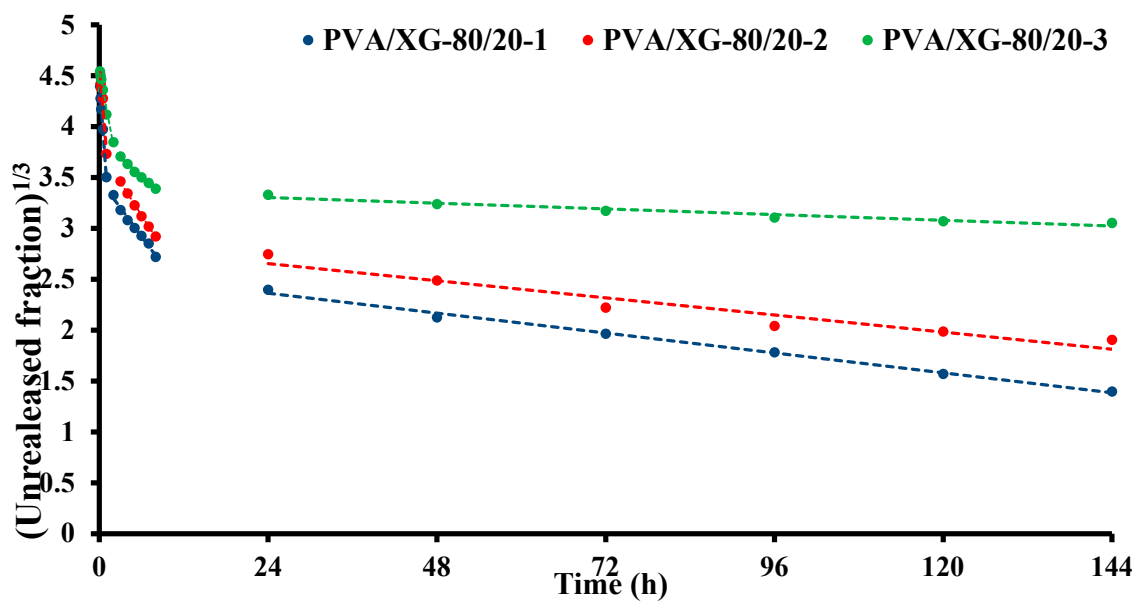

d) Hickson-Crowel

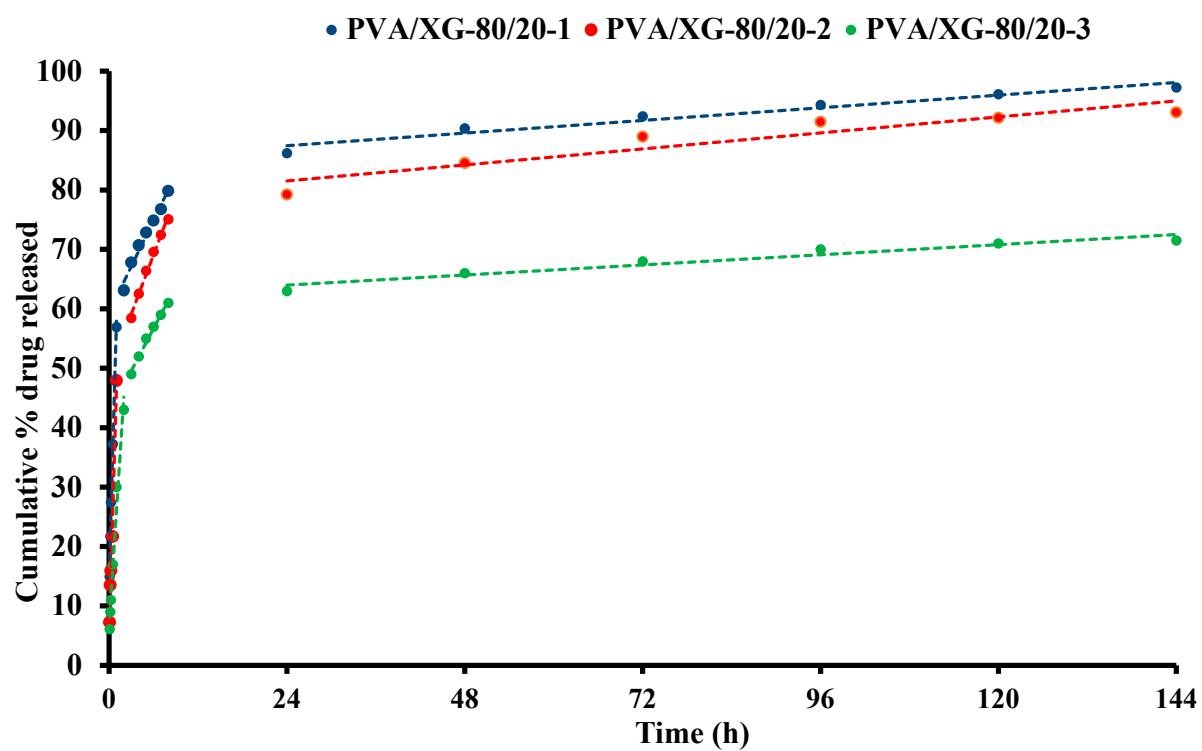

e) Zero Order

**Figure S4.** Different mathematical models fitted on the *in vitro* release profile on each of the three stages

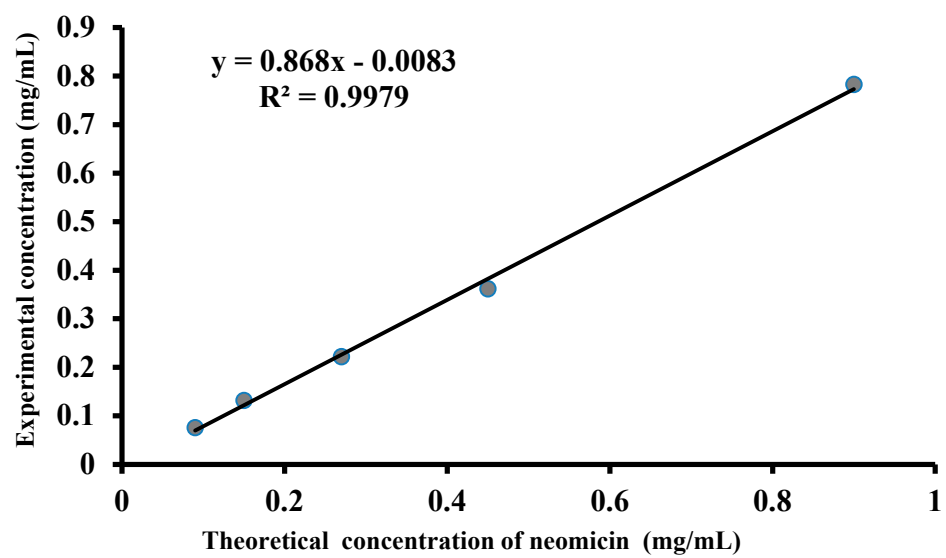

**Figure S5.** Calibration curve as obtained from NMR data
